# Supplementary material for: Puzzle—Chess Avoidance Puzzles
Source: Atypon-hosted journal article supplement (doi:10.1287/ited.2015.0141), 2015-05-01
Supplement: ited.2015.0141-sm [file ited.2015.0141-sm%2Favoid.xlsx]

## Sheet: Sheet1
	Piece	Name	Number	Symbol				1	2	3	4	5
	1	Queen	0	Q
	2	Bishop	4	B		1			B
	3	Knight	2	N		2						B
	4	Rook	0	R		3		B	N	B		N
	5	King	0	K
		DAS	1	2				1	2	3	4	5
	nd	1	1	1
	3	2	1	4		1		0	2	0	0	0
		3	1	5		2		0	0	0	0	2
						3		2	3	2	0	3
		Rows	3
		Columns	5
	NM	1	2
	1	-2	-1
	2	-2	1
	3	-1	2
	4	1	2
	5	2	1
	6	2	-1
	7	1	-2
	8	-1	-2
